# Supplementary material for: Spatial and Temporal Changes in Social Vulnerability to Natural Hazards in Mexico
Source: MDPI journal article supplement (doi:10.3390/ijgi13030066), 2024-02-22
Supplement: s1 [file s1]

## Supplementary material

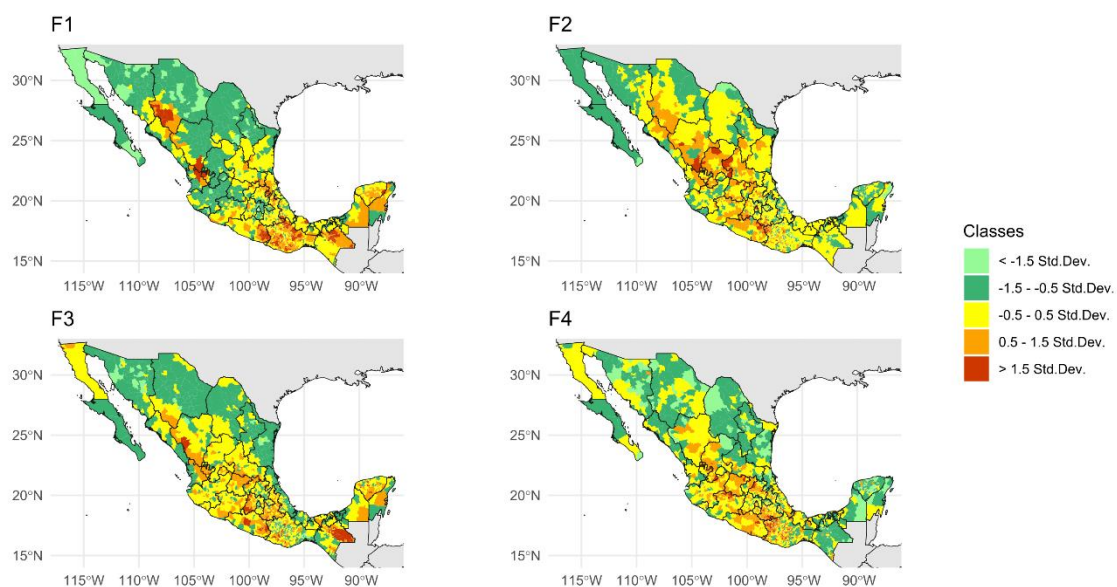

**Figure S1.** Spatial distribution of the four considered factors for the Social Vulnerability Index in 2000.

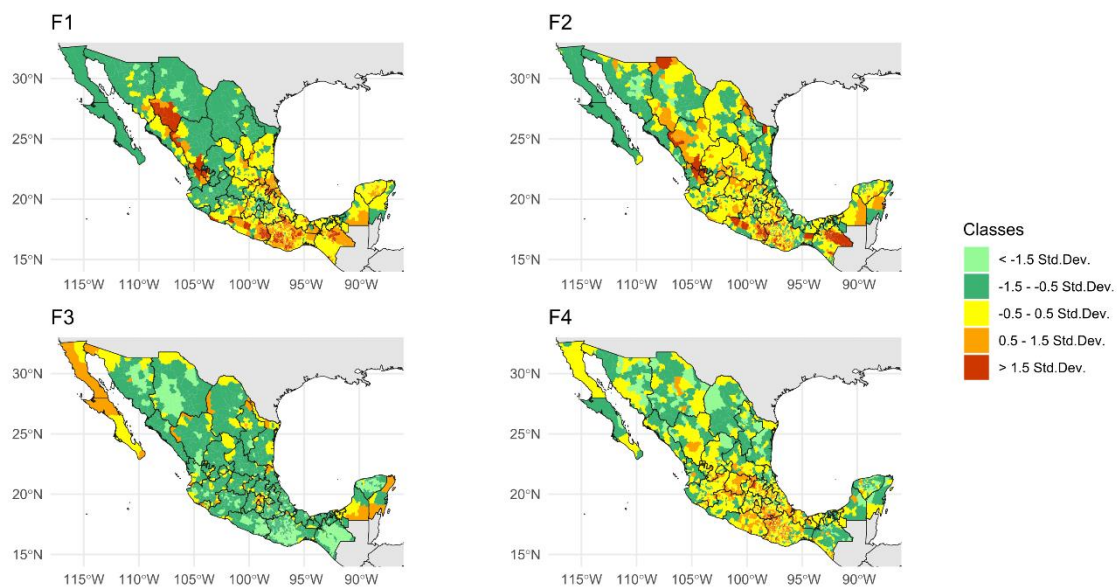

**Figure S2.** Spatial distribution of the four considered factors for the Social Vulnerability Index in 2010.

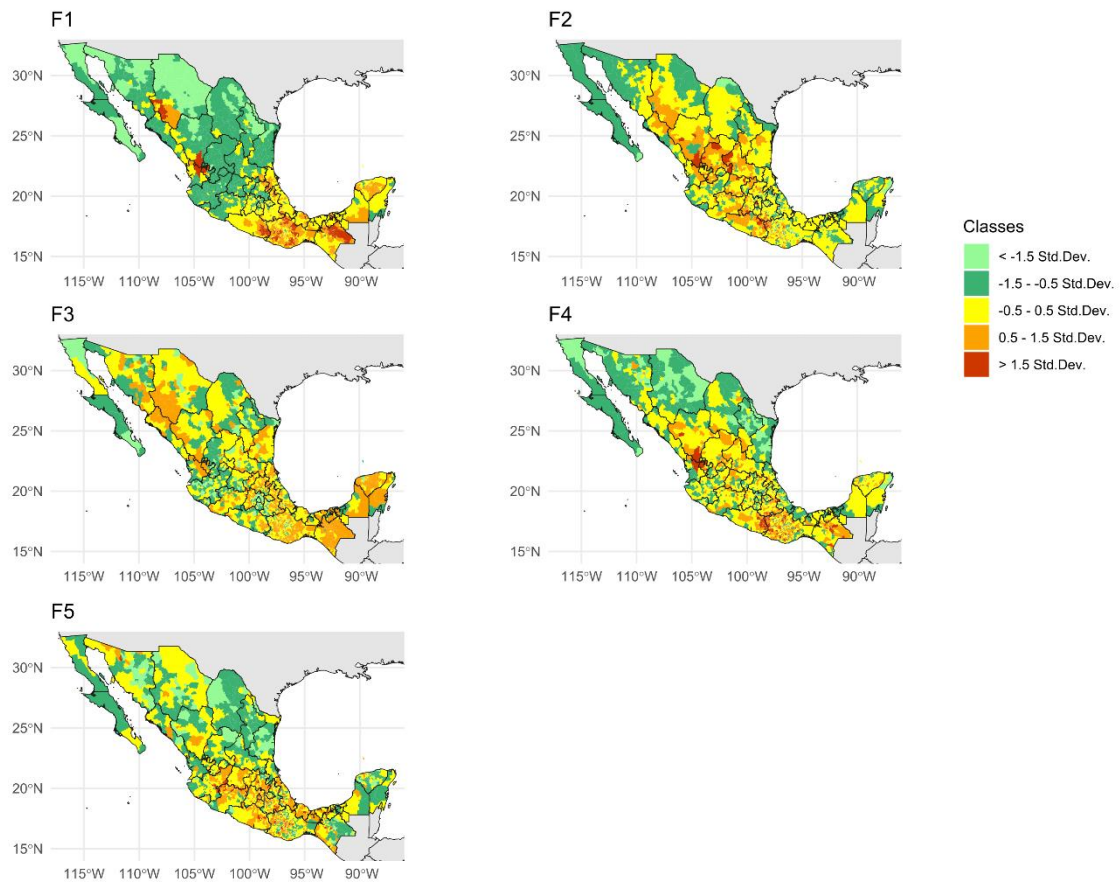

**Figure S3.** Spatial distribution of the five considered factors for the Social Vulnerability Index in 2020.
